# Supplementary material for: Inactivation of the RB family prevents thymus involution and promotes thymic function by direct control of Foxn1 expression
Source: PubMed Central journal article supplement — J Exp Med. 2013 Jun 3;210(6):1087–97. doi: 10.1084/jem.20121716 (PMC3674705; doi:10.1084/jem.20121716), 2013-06-03
Supplement: supp_jem.20121716_JEM_20121716_sm.pdf [file supp_jem.20121716_JEM_20121716_sm.pdf]

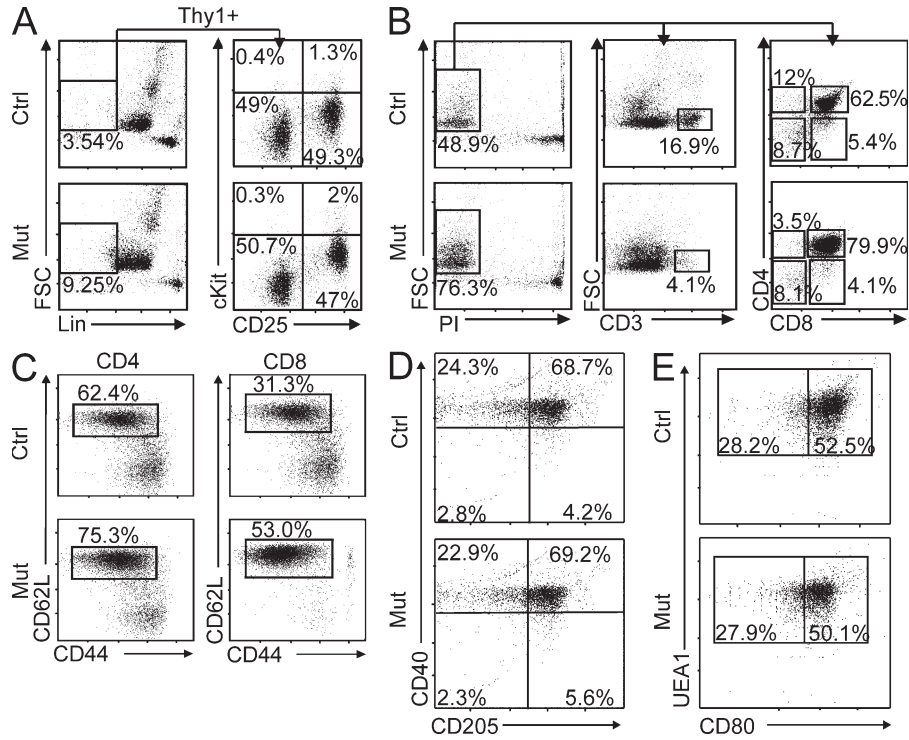

**Figure S1. Gating strategies.** All are log10 scale. (A) Representative FACS analysis of progenitor T cells in control (Ctrl; top) and *Mx1-Cre p107-Single* (Mut; bottom) mice. Lineage-negative (CD45<sup>-</sup>, Mac1<sup>-</sup>, Ter119<sup>-</sup>, Sca1<sup>-</sup>) cells were stained for Thy1, cKit, and CD25. (B) Representative FACS analysis of mature T cells in control (top) and *Mx1-Cre p107-Single* (bottom) mice. Live cells were stained for either CD3 $\epsilon$  or CD4/CD8 markers. (C) Representative FACS analysis of naive splenic T cells in control (top) and mutant (bottom) mice. Splenocytes were first stained for CD4 and CD8, and both subpopulations of T cells were stained for CD62L and CD44. Naive T cells are CD62L<sup>+</sup> CD44<sup>-</sup> ( $n = 5$ ). (D) Representative flow analysis of CD40<sup>-</sup> and CD205<sup>+</sup>-labeled cTEC subsets in control (top) and mutant (bottom) thymi. (E) Representative flow analysis of UEA1<sup>-</sup> and CD80<sup>+</sup>-labeled mTEC subsets in control (top) and mutant (bottom) thymi. FSC, forward scatter.
